## 1 **Original article**

### 2 **Different speciation types meet in a Mediterranean genus: the biogeographic** 3 **history of *Cymbalaria* (Plantaginaceae).**

4 Running head: Phylogeny and biogeographic history of *Cymbalaria*

5 Pau Carnicero<sup>1</sup>, Llorenç Sáez<sup>1, 2</sup>, Núria Garcia-Jacas<sup>3</sup> and Mercè Galbany-Casals<sup>1</sup>

6 *1 Departament de Biologia Animal, Biologia Vegetal i Ecologia, Facultat de Biociències,*  
7 *Universitat Autònoma de Barcelona, 08193 Bellaterra, Spain.*

8 *2 Societat d'Història Natural de les Balears (SHNB), C/Margarida Xirgu 16, E-07011 Palma de*  
9 *Mallorca, Balearic Islands, Spain.*

10 *3 Institut Botànic de Barcelona (IBB-CSIC-ICUB), Pg. del Migdia s/n, ES-08038 Barcelona, Spain*

11 Author for correspondence: Pau Carnicero, [pau.carnicero@gmail.com](mailto:pau.carnicero@gmail.com)

12 ORCID: P.C., <http://orcid.org/0000-0002-8345-3309>

13

14 **Abstract** *Cymbalaria* is a Mediterranean genus including ten species and six subspecies growing on  
15 rocky habitats. A very fragmented distribution, the different ecologic preferences of partially  
16 sympatric species and the presence of different ploidy levels, suggest the role of allopatric,  
17 sympatric ecological and polyploid speciation in its evolution. The aims of this study are to verify  
18 the monophyly and to reconstruct the phylogenetic relationships of *Cymbalaria*, to infer its  
19 biogeographic history by estimating the lineage divergence dates and the ancestral areas of  
20 distribution, and to discuss the role of different types of speciation. To address these issues, we  
21 constructed a complete phylogeny of the genus with ITS, 3'ETS, *ndhF* and *rpl32-trnL* sequences. A  
22 time-calibrated phylogeny and an ancestral-area estimation were obtained from the nrDNA data.  
23 The evidence supported the genus *Cymbalaria* as monophyletic. It originated ca. 5 Ma and three  
24 lineages segregated rapidly, one with the single extant taxa *Cymbalaria microcalyx* subsp.

25 *microcalyx* and the other two corresponding to western and central-eastern species, respectively.  
26 The main diversification events occurred after the onset of the Mediterranean climate and during  
27 Pleistocene oscillations. Founder-event and sympatric speciation were supported by the  
28 biogeographic analyses, and chromosome data combined with our phylogeny supported at least two  
29 polyploidization events. We observed that the consequences of physical barriers were different  
30 amongst the different species.

31 **Keywords** Ancestral-area estimation, cpDNA, founder-event speciation, long-distance dispersal,  
32 molecular dating, nrDNA

33 **Supplementary Material** Electronic Supplement (Figure S1, Table S1) are available in the  
34 Supplementary Data section of the online version of this article  
35 (<http://www.ingentaconnect.com/content/iapt/tax>).

36

## 37 **INTRODUCTION**

38 The Mediterranean Basin contains ca. 25,000 species and almost 10% of the world's vascular  
39 flora, of which 63% are endemics (Greuter, 1991). Three primary types of speciation might have  
40 originated this high diversity (Thompson, 2005). First, allopatric speciation is favoured in a  
41 fragmented landscape with a history of temporary land connections and isolations among the  
42 mainland and the numerous islands. Allopatric speciation is coupled with the effects of two major  
43 climatic events: the establishment of a Mediterranean climate approximately 3.2 Ma, which marked  
44 an increase in the rates of diversification for many plant lineages (Fiz-Palacios & Valcárcel, 2013),  
45 and the Pleistocene glaciations, which altered the distributions of species and favoured gene flow  
46 among populations in some cases, whereas in other cases populations became isolated in climatic  
47 refuges (Vargas, 2003; Médail & Diadema, 2009). Second, sympatric ecological speciation has also  
48 been documented (Santos-Gally & al., 2011) and is favoured by the wide heterogeneity of habitats  
49 and the altitudinal gradients in relatively small areas. Third, polyploid speciation is proposed for

50 many Mediterranean plant groups (Thompson, 2005). Because of the increase in genetic variation,  
51 polyploids are successful in the colonization of new niches to expand their ranges (Ramsey, 2011).

52 *Cymbalaria* Hill. (Plantaginaceae) is a genus of perennial herbs with ten species and six  
53 subspecies (Sutton, 1988; Bigazzi & Raffaelli, 2000), distributed throughout the Mediterranean  
54 Basin (Fig. 1). *Cymbalaria muralis* G. Gaertn., B. Mey. & Scherb., although native to the central  
55 Mediterranean Basin, is naturalised almost worldwide in temperate areas (Sutton, 1988) and is  
56 therefore the most widespread species. The last complete systematic revision of the genus was  
57 carried out by Sutton (1988), in which he highlighted some taxonomic conflicts, mainly regarding  
58 eastern Mediterranean taxa. *Cymbalaria* has been included in molecular studies on the tribe  
59 Antirrhineae (Ghebrehiwet & al., 2000; Vargas & al., 2004, 2013; Guzmán & al., 2015), but  
60 molecular analyses with a comprehensive sampling of the genus have never been performed. All  
61 *Cymbalaria* species grow in rocky habitats in a wide range of ecological conditions, from coastal  
62 cliffs to rock crevasses in the subalpine stage. The rocky habitats and most of the areas currently  
63 occupied by *Cymbalaria* species are considered to have remained climatically stable during  
64 Pleistocene glaciations (Thompson, 2005; Médail & Diadema, 2009), suggesting an important role  
65 of climatic refugia in the evolutionary history of *Cymbalaria*. Geographic isolation might have  
66 played a different role in speciation, since some species are narrow endemics geographically  
67 isolated from other taxa, while other species show very fragmented, disjunct, but broad distribution  
68 areas (Fig. 1). The last pattern could be caused by recent range expansion or by active gene flow  
69 among disjunct populations. Some species occur in sympatric areas but with well differentiated  
70 ecological preferences, likely suggesting the action of sympatric ecological speciation (Fig. 1, Table  
71 1). Ploidy levels vary across species and are often geographically grouped, ranging from diploids  
72 ( $2n = 14$ ) to octoploids ( $2n = 56$ , Fig. 1), supporting an important impact of polyploidy in driving  
73 speciation. Diploids mainly occur in the Apennine and Balkan peninsulas, with one species in the  
74 eastern Mediterranean; tetraploids ( $2n = 28$ ) occur in Sicily, the Balkan Peninsula and the eastern

75 Mediterranean basin, and a group of hexa- to octoploids ( $2n = 42, 56$ ) occur in Corsica, Sardinia  
76 and the Balearic Islands. The aforementioned features make *Cymbalaria* an exemplary case for the  
77 study of plant speciation in the Mediterranean Basin, suggesting that several processes and types of  
78 speciation originated the current diversity and distribution.

79 Multi-locus molecular phylogenies, molecular dating, diversification analyses and ancestral area  
80 estimation models, can be used to infer the biogeographic histories of plants at different taxonomic  
81 levels (e.g. Calviño & al., 2016; Cardinal-Mc Teague & al., 2016; Janssens & al., 2016). The well-  
82 known geomorphological and climatic history of the Mediterranean Basin, together with the high  
83 interest found on studying its high plant endemism and biodiversity, make it a very suitable and  
84 attractive area for reliable reconstructions of the spatio-temporal evolution of plant lineages (e.g.,  
85 Gaudeul & al., 2016; Hardion & al., 2016). Here we used cp- and nrDNA sequences to: (1) verify  
86 the monophyly of *Cymbalaria* and to clarify the phylogenetic relationships among the species, (2)  
87 estimate the divergence dates of the lineages and reconstruct the ancestral areas to infer the  
88 biogeographic history of the genus, and (3) examine the role of the different types of speciation in  
89 the evolution of *Cymbalaria*.

90

## 91 **MATERIALS AND METHODS**

92 **Plant Material.** – We sampled 34 individuals of *Cymbalaria*, representing all species and  
93 subspecies recognised in the last taxonomic treatments (Sutton, 1988; Bigazzi & Raffaelli, 2000;  
94 Appendix 1). Species from 11 additional genera of the tribe Antirrhineae were also sampled to  
95 confirm the placement of *Cymbalaria* within the tribe and to assess its monophyly. *Plantago*  
96 *lanceolata* L. was used as the outgroup for the tribe (Olmstead & al., 2001).

97 **DNA extraction, amplification and sequencing.** – To extract the DNA, the CTAB method  
98 (Doyle & Doyle, 1987), as modified by Cullings (1992) and Tel-Zur & al. (1999), and the  
99 commercial kit NucleoSpin® Plant were used (Macherey-Nagel GmbH & Co., KG, Düren,

100 Germany).

101 We amplified the ITS region and the conserved 3'ETS region of the nuclear ribosomal DNA  
102 (nrDNA) and the *ndhF* region and the *rpl32-trnL* spacer of the chloroplastic DNA (cpDNA). We  
103 used the primers ITS1 and ITS4 (Sun & *al.*, 1994) for the ITS region, Ast1 and 18SETS (Markos &  
104 Baldwin, 2001) for the 3'ETS region, 3'F (Eldenäs & *al.*, 1999) and +607 (Kim & Jansen, 1995) for  
105 the *ndhF* region and *rpl32F* and *trnL-UAG* (Shaw & *al.*, 2007) for the *rpl32-trnL* spacer. For some  
106 specimens, we designed and used internal specific primers for the *ndhF* region: (1) *ndhF* CymbF: 5'  
107 TGA ATC GGA CAA TAC CAT GTT ATT 3'; (2) *ndhF* CymbR: 5' ATT CAT ACC AAT TCG TCG  
108 AAT CCT 3'; (3) *ndhF* CymbF2: 5' ACG AGT AAT TGA TGG AAT TAC G 3'; and (4) *ndhF*  
109 CymbR2: 5' GAG TCT TAT CTG ATG AAT ATC 3'. The profile used for amplification of the ITS  
110 included 4 min denaturing at 95°C, followed by 30 cycles of 90 s denaturing at 94°C, 2 min  
111 annealing at 55°C and 3 min extension at 72°C, with an additional final step of 15 min at 72°C. The  
112 profile used for amplification of the *rpl32-trnL* spacer included 3 min denaturing at 94°C, followed  
113 by 30 cycles of 40 s denaturing at 95°C, 2 min annealing at 52°C and 2 min extension at 72°C, with  
114 an additional final step of 10 min at 72°C. We followed the PCR profiles described in Galbany-  
115 Casals & *al.* (2009) for the ETS and Galbany-Casals & *al.* (2012) for the *ndhF*. PCR products were  
116 purified with Exo-SAP-IT (USB Corp., Cleveland, Ohio, U.S.A.). Direct sequencing was conducted  
117 at the DNA Sequencing Core, CGRC/ICBR of the University of Florida, on an ABI 3730xl DNA  
118 Analyser (Applied Biosystems) using a Big Dye Terminator v.3.1 kit (Applied Biosystems, Foster  
119 City, CA, U.S.A.). See Appendix 1 and electronic supplement Table S1 for information on the  
120 vouchers and the sequences.

121 **Phylogenetic analyses.** – The sequences were examined and aligned by hand using Chromas  
122 Lite 2.0 (Technelysium Pty Ltd., Tewantin, Australia) and Mega 6.06 (Tamura & *al.*, 2013). The  
123 ambiguous regions of the alignments were manually excluded. Indels were codified as binary  
124 characters using the simple indel coding method (Simmons & Ochoterena, 2000) for the cpDNA

125 alignment. The nrDNA alignment provided enough variation so indels were not codified. Cp and  
126 nrDNA regions were analysed separately.

127 Maximum Parsimony (MP) analyses were conducted with PAUP\*v.4.0a147 (Swofford, 2002),  
128 with 10000 replicates of heuristic searches with random taxon addition and tree bisection-  
129 reconnection (TBR) branch swapping and holding all most parsimonious trees. The indels were  
130 coded as missing data, and the uninformative characters were excluded. The bootstrap analyses  
131 were performed with 1000 replicates, simple taxon addition and TBR branch swapping. The  
132 Consistency Index (CI), the Retention Index (RI) and the Homoplasy Index (HI) were calculated  
133 from the consensus tree (Electr. Suppl.: Table S1).

134 PartitionFinder (Lanfear & al., 2012) was used to find the best model of evolution and the best  
135 partitioning scheme under the Bayesian information criteria (BIC; Schwarz, 1978), for purpose of  
136 the Bayesian Inference (BI) analyses. All loci were defined as unique partitions and the models  
137 tested were those implemented in BEAST and MrBayes. A greedy search algorithm was selected for  
138 running the analysis for each dataset. The BI analysis of the cpDNA sequences was conducted with  
139 MrBayes v.3.2 (Ronquist & al., 2012). For the analysis of the coded indels of the rpl32 the simplest  
140 possible model, i.e. the Jukes Cantor model, was used. We generated 10,000 trees running MrBayes  
141 for 5,000,000 generations and sampling one of every 500 generations. After ensuring that the  
142 Markov chain Monte Carlo (MCMC) reached stationarity, we discarded the first 2500 trees as burn-  
143 in.

144 **Divergence time estimation.** – The dating analysis was performed using the nrDNA sequences  
145 because of the low resolution obtained with the cpDNA gene tree and also with a nrDNA-cpDNA  
146 combined analysis (not shown), and the incongruences found between the two genomes. After a  
147 preliminary analysis using all the specimens sampled (Electr. Suppl.: Fig. S1), we pruned the data  
148 set to include only one specimen for each taxon to represent only the cladogenetic events that  
149 resulted in speciation or different genetic lineages. Accordingly, for *C. aequitriloba* (Viv.) A. Chev.,

150 we included three individuals representing three genetic lineages: *Cymbalaria aequitriloba* 1  
151 represented the Corsican lineage; *C. aequitriloba* 3, the Balearic lineage; and *C. aequitriloba* 5, the  
152 Sardinian lineage. Due to the absence of fossils in the tribe, we performed the analysis with a  
153 secondary calibration point obtained from Vargas & al. (2013). This approach has been criticized  
154 but is accepted in the absence of fossils for a direct calibration (Forest, 2009). The use of the  
155 nrDNA gene tree for the divergence time estimation analyses could also cause phylogenetic  
156 artefacts derived from the concerted evolution of ribosomal genes (Soltis & al., 1998; Álvarez &  
157 Wendel, 2003). Using a fully resolved, multi-locus phylogeny would be desirable (Maddison &  
158 Knowles, 2006), but molecular dating based on nrDNA has been successfully used in cases of low  
159 resolution and high level of polymorphism of cpDNA markers and incongruence with nrDNA  
160 markers (e.g., Gao & al., 2015; Nie & al., 2015).

161 The dating analysis was performed in BEAST 2 (Bouckaert & al., 2014), and the divergence  
162 between *Epixiphium wilizeni* (A. Gray) Munz and the clade *Asarina procumbens* Mill.-*Cymbalaria*  
163 was modelled as a normal distribution with a mean of 20.8 Ma and a standard deviation of 4.4 Myr.  
164 A birth-death model was employed as a tree prior (Gernhard, 2008). We used an uncorrelated  
165 relaxed clock lognormal model of the lineage-specific rate variation (Drummond & al., 2006) and  
166 set a uniform distribution with ranges of  $5 \times 10^{-4}$ – $5 \times 10^{-2}$  substitutions per site per Ma (s/s/Ma,  
167 Blanco-Pastor & al., 2012). These constraints include the previous estimates for herbaceous plants  
168 ITS ( $1.7$ – $8.3 \times 10^{-3}$  s/s/Ma; Kay & al., 2006) and ETS rates (1.3–2.4 fold higher than ITS rates;  
169 Baldwin & Markos, 1998). Two MCMCs were run for 100,000,000 generations, and the trees were  
170 sampled every 10,000 generations. The details of the model are in the .xml file (available on request  
171 from the corresponding author). We verified the convergence of runs and that stationarity was  
172 reached with the inspection of effective sample sizes in Tracer v1.6.0 (Rambaut & al., 2013). The  
173 trees were combined with LogCombiner v1.6.2 after discarding the first 25% of the trees as burn-in.  
174 We summarized the output in a maximum clade credibility (MCC) tree with TreeAnnotator v1.6.2.

175 To represent diversification through time, we used the R-package APE 3.3 (Paradis & al., 2004)  
176 to construct the lineage-through-time (LTT) plots. We used the  $dAIC_{RC}$  test (Rabosky, 2006a) as  
177 implemented in the R-package LASER (Rabosky, 2006b) to infer whether the diversification rate  
178 changed over time. We tested the observed value of  $dAIC_{RC}$  against a null distribution of  $dAIC_{RC}$   
179 values obtained from 1000 random phylogenetic trees generated under the constant rate pure birth  
180 model. The MCC tree and a random sample of 1000 trees from the posterior distribution from the  
181 dating analysis were used as input files after pruning the outgroup taxa.

182 **Ancestral-area estimation.** –We used the dated tree after pruning the outgroup taxa, since  
183 neither *Asarina* nor *Epixiphium* shared their distribution with any *Cymbalaria* taxon and a  
184 preliminary analysis including the outgroup resulted in very ambiguous estimation of ancestral  
185 areas for the basal nodes (not shown). We considered eight areas (Fig. 2) based on previously  
186 defined biogeographic patterns (Takhtajan, 1986; Rivas-Martínez & al., 2004) and on the endemism  
187 and distribution patterns of *Cymbalaria*.

188 We performed the biogeographic analysis with BioGeoBEARS (Matzke, 2013). This R-package  
189 implements six biogeographic models in a common likelihood framework: a likelihood version of  
190 Dispersal-Vicariance analysis (DIVALIKE; Ronquist, 1997), LAGRANGE Dispersal and Extinction  
191 Cladogenesis (DEC) model (Ree & al., 2005; Ree & Smith, 2008), a likelihood version of BayArea  
192 (Landis & al., 2013), and an alternative version for each of the models that includes founder-event  
193 speciation (+J). BioGeoBEARS has two primary advantages compared with other biogeographical  
194 programs: 1) the best model is selected with likelihood ratio tests, and 2) founder-event speciation is  
195 included, a process ignored by most other methods.

196 The maximum number of areas for each node was set to 3, which is the maximum number of  
197 areas occupied by extant taxa (Ronquist, 1996; Hilpold & al., 2014). Each terminal in the tree was  
198 coded with the total distribution area of the taxon/lineage, except for *C. muralis*, that was only  
199 coded for its natural distribution area. We defined a dispersal probability matrix to determine the



200 effect of geographic distance on dispersal ability. The rate of dispersal between western (Fig. 2; C,  
201 D) and eastern Mediterranean areas (H, I, J) was set to 0.5 following Hilpold & al. (2014) and was  
202 set to 1 for the other cases, to reflect the low probabilities of dispersing from eastern to western  
203 Mediterranean areas without an intermediate stage in the central Mediterranean areas (E, F, G). We  
204 ran the six models and after testing them with a likelihood ratio test and the Akaike Information  
205 Criterion (AIC), the DEC+J model was selected.

206

## 207 RESULTS

208 **Phylogenetic analyses.** – The analyses of the nrDNA with MP and BI resulted in congruent  
209 topologies (Fig. 2, Electr. Suppl.: Table S1, Fig. S1). *Cymbalaria* was recovered as a monophyletic  
210 genus (Fig. 2, PP = 1; BS = 92%) sister to *A. procumbens*, and these two genera together  
211 subsequently sister to *E. wislizeni* (PP = 1; BS = 90%). Two main lineages were obtained within  
212 *Cymbalaria*, respectively composed of the central and eastern Mediterranean species (centre-east  
213 lineage, PP = 1; BS = 98%) and the western Mediterranean species (west lineage, PP = 1; BS =  
214 100%). *Cymbalaria microcalyx* (Boiss.) Wettst. subsp. *microcalyx* was sister to the west lineage  
215 without statistical support (PP = 0.55).

216 The analyses of the cpDNA with MP and BI resulted in a congruent topology with each other  
217 (Fig. 3, Electr. Suppl.: Table S1). *Cymbalaria* was monophyletic (PP = 1; BS = 77%) and grouped  
218 with *A. procumbens* (PP = 1; BS = 76%) and these two genera with *E. wislizeni* (PP = 1; BS =  
219 95%). The phylogenetic position of *Chaenorhinum crassifolium* (Cav.) Lange was incongruent with  
220 the nrDNA analyses, but congruent with previous cpDNA phylogenies (Ghebrehiwet & al. 2000;  
221 Vargas & al., 2013). Resolution at the species level was lower compared to the nrDNA analyses and  
222 a few incongruences were detected. In the cpDNA analysis *C. microcalyx* subsp. *ebelii* (Cufod.)  
223 Cufod. grouped with *C. glutinosa* Bigazzi & Raffaelli, *C. muralis* and *C. pallida* Wettst., (PP =  
224 0.99) while in the nrDNA analyses it formed a clade with *C. pubescens* (J. Presl & C. Presl) Cufod

225 (Fig. 2, PP = 0.98; BS = 75%). Slightly incongruent phylogenetic relationships were obtained in the  
226 western lineage too. For the taxa with two or more specimens sampled, only *C. glutinosa* subsp.  
227 *glutinosa*, *C. pallida* and *C. pubescens* were monophyletic in both the cp and nrDNA data sets (Fig.  
228 3, Electr. Suppl.: Fig. S1).

229 **Divergence time estimation analyses.** – The first diversification within *Cymbalaria* occurred  
230 4.83 Ma (node 1, 9.28–1.07 Ma 95% HPD). The first cladogenesis events in the centre-east and  
231 west lineages occurred 1.87 Ma (node 8, 3.96–0.38 Ma 95% HPD) and 1.23 Ma (node 3, 2.93–0.22  
232 Ma 95% HPD), respectively. The LTT plot showed a notable increase of diversification towards the  
233 present. However, the dAIC<sub>RC</sub> test did not reject the null hypothesis of a constant rate of  
234 diversification (p-value = 0.99). Among the two constant rate models tested, a pure birth model was  
235 selected (dAIC<sub>RC</sub> = -1.31).

236 **Ancestral-area estimation.** – Many different areas were recovered with similar probability  
237 values with the DEC+J analysis for the ancestral area of the MRCA of *Cymbalaria* (not shown).  
238 The MRCA of the west lineage was most probably distributed in Corsica-Sardinia (Fig. 2, node 3, P  
239 = 81%), and two dispersal events to the Balearic Islands were inferred within this clade in nodes 6  
240 and 7. Several areas with similar probability values were recovered for the ancestral area for the  
241 centre-east lineage MRCA (node 8), the eastern species clade (nodes 15 and 16) as well as for the  
242 basal nodes of the central species clade (9 and 10). The MRCA of *C. pubescens* and *C. microcalyx*  
243 subsp. *ebelii* was probably distributed in the northern Italian and Balkan peninsulas (node 14, P =  
244 69%) and a subsequent dispersal to Sicily originated *C. pubescens*. *Cymbalaria pallida* and *C.*  
245 *muralis* subsp. *visianii* (Jáv.) D.A. Webb evolved in the northern part of the distribution of their  
246 MRCA, which occupied the Italian and northern Balkan peninsulas (nodes 12 and 13, P = 75% and  
247 92%, respectively).

248

249 **DISCUSSION**

250

251       **The origin of *Cymbalaria* and early diversification.** – Based on our results, *Cymbalaria* split  
252 from *Asarina* in the late Miocene-Pliocene (Fig. 2). Although statistical supports were low for this  
253 node in the nrDNA analyses, *Asarina* was also found to be sister to *Cymbalaria* with high statistical  
254 support in the cpDNA analysis (Fig. 3), as well as in previous studies with both cp and nrDNA  
255 (Ghebrehiwet & al., 2000; Vargas & al., 2004, 2013). Several ancestral areas with low probability  
256 values were estimated for the MRCA of *Cymbalaria*. However, a western origin can most probably  
257 be discarded, given that low ploidy levels are found in the central and eastern Mediterranean basin  
258 (Fig. 1), and western taxa are all polyploids, thus presumably of more recent origin (e.g. Garcia-  
259 Jacas & Susanna, 1992).

260       The low resolution observed in the basal nodes of *Cymbalaria* in the nrDNA tree and the LTT  
261 plot might reflect a rapid initial diversification (Riina & al., 2013; Viales & al., 2014), followed by  
262 an apparent lack of diversification until ca. 2 Ma, when diversification increased rapidly (Fig. 2).  
263 However, the dAIC<sub>RC</sub> test could not reject a constant rate of diversification since the origin of the  
264 genus. The pattern of increased diversification towards the present observed in the LTT plot could  
265 be explained by the “pull of the present” phenomenon (Nee & al., 1994; Kubo & Iwasa, 1995). A  
266 constant extinction rate can result in an excess of recently diverged lineages that could lead to the  
267 wrong conclusion of an increase of the diversification rate (Nee & al., 2001). This phenomenon is  
268 also the reason why detecting increases in the diversification rate is more difficult than decreases,  
269 and therefore results should be interpreted with caution (Rabosky, 2006a).

270       **The establishment of the Mediterranean climate and the diversification of lineages.** – The  
271 diversification of the two observed lineages occurred after the onset of the Mediterranean climate  
272 (3.2 Ma, Fig. 2), supporting the role of this climatic event as a trigger for diversification within  
273 many Mediterranean plant lineages (Fiz-Palacios & Valcárcel, 2013, and references therein). In this  
274 particular case, the Mediterranean climate likely favoured isolation of *Cymbalaria* populations in

275 small, suitable microclimatic areas, favouring allopatric speciation events.

276 Ancestral area for the centre-east lineage was poorly estimated, and its descendant east and  
277 central subclades were low statistically supported, but they are congruent with the primary genetic  
278 barrier found in other groups (e.g. *Cerastium dinaricum* Beck & Szyszyl.: Kutnjak & al. 2014;  
279 *Edraianthus graminifolius* A.DC.: Surina & al., 2014) and with the floristic provinces (Takhtajan,  
280 1986). The decline in global temperature during Pleistocene glaciations (2.6–0.01 Ma, Thompson,  
281 2005; Médail & Diadema, 2009) would have presumably restricted the suitable habitats for  
282 *Cymbalaria* in the continent to only small patches along the coast on the northern Balkan Peninsula.  
283 This scenario could explain the origin of the barrier between the eastern and central areas on both  
284 sides of the Balkans, which points to an allopatric speciation process. For the central Mediterranean  
285 species, three supported clades were recovered. The clades *C. glutinosa* (Fig. 2, node 11) and *C.*  
286 *muralis*-*C. pallida* (Fig. 2, node 12) represented two groups of diploid taxa with partially sympatric  
287 distribution areas and unequal ecological requirements: *Cymbalaria glutinosa* occurs in warm  
288 Mediterranean areas in the southern half of Italian peninsula, whereas *C. pallida* and *C. muralis*  
289 occupy northern, wetter and cooler places in the Italian peninsula that extend to the northern Balkan  
290 peninsula in the case of *C. muralis* (Pignatti, 1982; Fig. 1, Table 1). In the same line, whereas *C.*  
291 *muralis* occupies humid lowlands, *C. pallida* is endemic to the highest elevations of the Apennine  
292 Range (Pignatti, 1982; Fig. 1, Table 1). In both cases, sympatric speciation was inferred. The third  
293 clade was composed by the tetraploids *C. pubescens* and *C. microcalyx* subsp. *ebelii* (Fig. 2, node  
294 14). Their common ancestor was inferred to be present on the northern Italian and Balkan  
295 peninsulas, from which a dispersal to Sicily and further isolation originated *C. pubescens*, a route  
296 also proposed for other plant groups (e.g. *Centaurea cineraria* L. group: Hilpold & al., 2011;  
297 *Edraianthus graminifolius*: Surina & al., 2014). However, according to the cpDNA phylogeny (Fig.  
298 3), *C. microcalyx* subsp. *ebelii* would be closely related to central Mediterranean taxa, but not to *C.*  
299 *pubescens*, which instead was grouped with eastern taxa without statistical support. The eastern

300 Mediterranean clade was not supported statistically at its basal node (Fig. 2, node 15), and the  
301 ancestral area estimation was ambiguous recovering the highest probabilities for ancestors  
302 distributed across two to three eastern Mediterranean areas. The Aegean Islands were reconnected  
303 many times to the mainland during the Pleistocene climatic oscillations, which led to range  
304 expansions and subsequent allopatric speciation events when the sea level increased (Polunin,  
305 1980). Founder-event speciation was inferred for the split between *C. microcalyx* subsp. *dodekanesi*  
306 Greuter and subsp. *acutiloba* (Boiss. & Heldr.) Greuter (Fig. 2, node 17), although the direction of  
307 the dispersal event was not clear. By contrast, the fluctuations in sea level had no apparent effect on  
308 *C. longipes* (Boiss. & Heldr.) A. Chev.; this species is widely distributed on coastal cliffs of the  
309 Aegean region with apparent adaptations to marine dispersal (Sutton, 1988), which would lead to a  
310 continuous gene flow.

311 A Corso-Sardinian origin for the west lineage during the Pleistocene was supported (Fig. 2, node  
312 3). Founder-event speciation was reconstructed for *C. fragilis* (J.J. Rodr.) A. Chev. after a long-  
313 distance dispersal (LDD) event from Corsica-Sardinia (Fig. 2, node 7). At least one more LDD  
314 event was inferred for the range expansion of *C. aequitriloba* to the Balearic Islands (Fig. 2, node  
315 6). These two areas were last connected approximately 20 Ma (Speranza & al., 2002), and therefore,  
316 a vicariant alternative to the LDD event (suggested by Verlaque & al., 1993) must be discarded.  
317 Long-distance dispersal events were previously invoked to explain the origin of some of the  
318 endemic plant species with a disjunct Balearic-Corso-Sardinian distribution (e.g. *Thymus herba-*  
319 *barona* Loisel.: Molins & al., 2011). Moreover, Nieto Feliner (2014) reports that LDD events have  
320 not been rare in the Mediterranean, even when no particular adaptations for seed dispersal exist.  
321 The success in colonization of new areas is often linked more to pre-adaptations of genotypes and  
322 availability of suitable habitats than to distance (Alsos & al., 2007). Polyploidy may have been a  
323 key trait in the colonization processes because it potentially provided an increased ability to tolerate  
324 a wide range of ecological conditions (Ramsey, 2011). Additionally, because of low interspecific

325 competition in rocky habitats and low diversity on islands, more niches would be available, with the  
326 likely consequence of higher success in colonization (Thompson, 2005).

327 **Speciation.** – The three primary types of speciation likely occurred throughout the evolution of  
328 *Cymbalaria*. Based on our results combined with published chromosome counts, the hypotheses of  
329 allopatric speciation, sympatric speciation and polyploid speciation are supported.

330 Allopatric speciation is inferred when sister taxa occupy different areas isolated by physical  
331 barriers. The two main types of allopatric speciation are vicariance and founder-event speciation,  
332 which results from founder events. In historical biogeography, vicariance has long been recognized  
333 as a key process in diversification (Ronquist, 1997), and implies that a widely distributed ancestor  
334 gives rise to two or more separate species within its original distribution area when the appearance  
335 of a physical barrier provokes their reproductive isolation. However, in *Cymbalaria*, vicariance was  
336 not inferred for any statistically supported node. By contrast, founder-event speciation is a process  
337 largely ignored in historical biogeographical models but is currently recognized as an essential  
338 process (Gillespie & al., 2012; Matzke, 2013). It involves a rapid divergence of a small, peripheral  
339 population of a species, and is inferred when the area of one of the descendants is not part of the  
340 ancestor's distribution area. Indeed, the selection of the DEC+J model indicated that founder-event  
341 speciation (parameter J) was important for the model to fit our data. Our results supported founder-  
342 event speciation in three cases: the origin of *C. pubescens* (Fig. 2, node 14), the split between *C.*  
343 *microcalyx* subsp. *acutiloba* and *C. microcalyx* subsp. *dodekanesii* (Fig. 2, node 17), and the origin  
344 of *C. fragilis* (Fig. 2, node 7). This last case shows the typical structure of a founder-effect  
345 speciation event, where the newly and rapidly generated species (*C. fragilis*) is embedded in a more  
346 widely distributed and genetically variable, paraphyletic species (Futuyma, 2005), in this case *C.*  
347 *aequitriloba* (Fig. 2). For *C. fragilis*, LDD was inferred (see above), but in the other two cases, the  
348 low sea levels during the Pleistocene glaciation periods may have favoured a stepping stone  
349 dispersal to new areas (e.g., Campanulaceae: Cellinese & al., 2009; *Centaurea cineraria* group:

350 Hilpold & al., 2011).

351 DEC+J model inferred sympatric speciation in six statistically supported clades (Fig. 2, nodes 3,  
352 4, 5, 11, 12 and 13). However, geographical and ecological isolation are not mutually exclusive, and  
353 their effects are difficult to disentangle from one another (Papadopulos & al., 2014). Most of the  
354 inferred cases of sympatric speciation in our results could be interpreted as artefacts of the  
355 resolution used when defining the areas. For example, the split between the Corsican lineage  
356 (*C.aequitriloba* 1 and *C. hepaticifolia* 1) and the rest of the taxa within the west lineage (Fig. 2,  
357 node 3) might have been a case of geographical isolation of this island from Sardinia. Moreover,  
358 geographical isolation can also occur at a local scale, particularly for plants that grow in rock  
359 crevices such as *Cymbalaria*. These habitats can be scarce and isolated from one another, favouring  
360 small-scale allopatric speciation processes (Thompson, 2005). However, in groups of taxa where  
361 gene flow is possible due to long distance dispersal, the recognition of putative geographic barriers  
362 is a difficult task. An additional impediment is that distribution areas can change over time, and  
363 current sympatric species could have originated allopatrically and later expanded their areas to  
364 become sympatric. Apart from these limitations, to infer sympatric ecological speciation, it would  
365 be desirable to demonstrate that adaptation to the different ecological niches exists and it is actually  
366 the cause of reproductive isolation, assuming that ecological niches have not changed significantly  
367 from the speciation moment until the present (Carine & Schaefer, 2009). Very local scale  
368 environmental measures would be required to properly describe ecological niche in the case of  
369 *Cymbalaria*, since the habitats where they occur (Table 1) have usually very different microclimatic  
370 conditions than the general climatic available data, which make methods such as species  
371 distribution modelling fail (Guisan & Thuiller, 2005; Austin, 2007). In our group of study,  
372 sympatric ecological speciation could explain the differentiation of *C. muralis* and *C. pallida*, as  
373 inferred by the DEC+J model (Fig. 2, node 12). These two species occur in the same region  
374 (northern Italy), often within a few hundreds of metres of one another (P. Carnicero & M. Galbany-

375 Casals, personal observations) and occupy different niches (Table 1). However, their distributions at  
376 local scale are almost allopatric, given that *C. muralis* mostly occupies the lowlands while *C.*  
377 *pallida* grows in higher elevations. Thus, allopatric speciation could not completely be ruled out.

378 The important role of polyploid speciation in the diversification of *Cymbalaria* was already  
379 suggested by others (Verlaque & al., 1993; Thompson, 2005). Biogeographic analyses never  
380 integrate polyploid speciation; however, we consider that genome duplication event occurred when  
381 a supported clade composed by specimens of the same ploidy level is found (as assumed by e.g.  
382 Wood et al., 2009, Marcussen et al., 2015), and therefore that the clade originated from a polyploid  
383 speciation event. Polyploid species placed in different supported clades would have had been  
384 originated by independent polyploidization events. Accordingly, two polyploid speciation events are  
385 hypothesized: one for the origin of the west lineage (Fig. 2, node 3) and the other for the origin of  
386 the *-C. microcalyx* subsp. *ebelii*-*C. pubescens* clade (Fig. 2, node 14). The monophyly of the west  
387 lineage species apparently refutes the hypothesis of independent polyploid origins for *C.*  
388 *hepaticifolia* Wettst. and *C. aequitriloba* from the diploids *C. pallida* and *C. muralis* of the Italian  
389 Peninsula, respectively, as suggested by Verlaque & al. (1993). However, the polyploid clades could  
390 be the result of interlocus concerted evolution of the nrDNA (ITS and ETS), which may hide the  
391 genetic information of one of the parental lineages in the case of allopolyploids (Wendel & al.,  
392 1995). This hypothesis has to be specially considered for the clade *C. microcalyx* subsp. *ebelii* – *C.*  
393 *pubescens*, given that these two species appear in separate clades in the cpDNA analysis (Fig. 3).  
394 Additional studies are required to confirm the common origin of the species in each of the two  
395 polyploidy clades and to distinguish between the auto- and allopolyploidization events and the  
396 parental taxa involved. The support to LDD events found here for the western clade (see subsection:  
397 The establishment of the Mediterranean climate and the diversification of lineages) is consistent  
398 with the observed pattern of higher probability of LDD events in polyploid groups (Linder &  
399 Barker, 2014). This pattern may be associated to the high genetic variability of polyploids but also



400 to their difficulty in succeeding in areas in which the parental species occur (Thompson, 2005;  
401 Ramsey, 2011).

402     **Conclusions.** – Many characteristics of the genus *Cymbalaria* are of value to increase our  
403 understanding of the processes that shaped the current biodiversity of the Mediterranean. The  
404 evolution of *Cymbalaria* was marked by climatic events, particularly by the onset of the  
405 Mediterranean climate and the Pleistocene climatic oscillations. Both geographical and ecological  
406 barriers played important roles in the speciation of the genus, but the identical barrier might have  
407 had disparate consequences for closely related taxa, as shown by two examples in both the eastern  
408 and western Mediterranean. In both cases, one species is widely distributed across sea (*C.*  
409 *aequitriloba* in the west and *C. longipes* in the east), whereas the same geographic isolation acted as  
410 barrier and originated *C. fragilis* and the differentiation of *C. microcalyx* subspecies, respectively in  
411 the western and eastern Mediterranean Basin. Polyploidy, by increasing the ability to colonize new  
412 areas and promoting rapid speciation, is proposed as a key process in the diversification of  
413 *Cymbalaria*. The supported monophyly of the genus found for both the cp and nrDNA analyses  
414 support its current taxonomy status. However, our study revealed some conflicts between current  
415 taxonomy and phylogeny at the species and subspecies level, being *C. microcalyx* the most  
416 shocking case, with some of its subspecies showing very distant phylogenetic positions from each  
417 other (Figs. 2, 3). When more than one specimen per taxon was used, only *C. glutinosa* subsp.  
418 *glutinosa*, *C. pallida* and *C. pubescens* were monophyletic for both the cp and nrDNA (Fig. 3,  
419 Electr. Suppl.: Fig. S1). Detailed studies combining molecular and morphological data are needed to  
420 definitely unravel the taxonomy of *Cymbalaria*.

421

## 422     **ACKNOWLEDGEMENTS**

423     We thank all herbaria that provided material and colleagues who provided assistance during  
424 fieldwork or their own plant material. We also thank M. Fernández-Mazuecos for providing the data

425 on the secondary calibration point for the dating analyses and C. Roquet for technical assistance on  
426 the ancestral-area estimation. This research was funded in part by the Spanish government  
427 (CGL2010-18631/BOS and *Flora iberica* project, CGL2011-28613-C03-01) and the Catalan  
428 government (2009-SGR 439 and 2014-SGR 514). Pau Carnicero benefited from the support of a  
429 PIF Ph.D. student fellowship from the Universitat Autònoma de Barcelona.

430

#### 431 **LITERATURE CITED**

- 432 **Alsos, I.G., Eidesen, P.B., Ehrich, D., Skrede, I., Westergaard, K., Jacobsen, G.H., Landvik,**  
433 **J.Y., Taberlet, P. & Brochmann, C.** 2007. Frequent long-distance plant colonization in the  
434 changing Arctic. *Science*, 316: 1606–1609. <http://dx.doi.org/10.1126/science.1139178>
- 435 **Álvarez, I. & Wendel, J.F.** 2003. Ribosomal ITS sequences and plant phylogenetic inference.  
436 *Molec. Phylogen. Evol.* 29: 417–434. [http://dx.doi.org/10.1016/S1055-7903\(03\)00208-2](http://dx.doi.org/10.1016/S1055-7903(03)00208-2)
- 437 **Austin, M.** 2007. Species distribution models and ecological theory: A critical assessment and  
438 some possible new approaches. *Ecol. Model.* 200: 1–19.  
439 <http://dx.doi.org/10.1016/j.ecolmodel.2006.07.005>
- 440 **Baldwin, B.G. & Markos, S.** 1998. Phylogenetic utility of the external transcribed spacer (ETS) of  
441 18S-26S rDNA: congruence of ETS and ITS trees of *Calycadenia* (Compositae). *Molec.*  
442 *Phylogen. Evol.* 10: 449–63. <http://dx.doi.org/10.1006/mpev.1998.0545>
- 443 **Bigazzi, M. & Raffaelli, M.** 2000. Taxonomy of two *Cymbalaria* species (Scrophulariaceae)  
444 endemic to Italy: *C. glutinosa* sp. nov. and *C. pubescens* (J. & C. Presl) Cuf. *Webbia* 54: 201–  
445 205. <http://dx.doi.org/10.1080/00837792.2000.10670679>
- 446 **Blanco-Pastor, J.L., Vargas, P. & Pfeil, B.E.** 2012. Coalescent simulations reveal hybridization  
447 and incomplete lineage sorting in Mediterranean *Linaria*. *PLoS One* 7: e39089.  
448 <http://dx.doi.org/10.1371/journal.pone.0039089>.

- 449 **Bouckaert, R., Heled, J. & Kühnert, D.** 2014. BEAST 2: a software platform for Bayesian  
450 evolutionary analysis. *PLoS Comput. Biol.* 10: e1003537.  
451 <http://dx.doi.org/10.1371/journal.pcbi.1003537>
- 452 **Calviño, C.I., Teruel, F.E. & Downie, S.R.** 2016. The role of the Southern Hemisphere in the  
453 evolutionary history of Apiaceae, a mostly north temperate plant family. *J. Biogeogr.* 43: 398–  
454 409. <http://dx.doi.org/10.1111/jbi.12651>
- 455 **Cardinal-McTeague, W.M., Sytsma, K.J. & Hall, J.C.** 2016. Biogeography and diversification of  
456 Brassicales: A 103 million year tale. *Molec. Phylogen. Evol.* 99: 204–224.  
457 <http://dx.doi.org/10.1016/j.ympev.2016.02.021>
- 458 **Carine, M.A. & Schaefer, H.** 2009. The Azores diversity enigma: why are there so few Azorean  
459 endemic flowering plants and why are they so widespread? *J. Biogeogr.* 37: 77–89.  
460 <http://dx.doi.org/10.1111/j.1365-2699.2009.02181.x>
- 461 **Castro, M. & Rosselló, J.A.** 2006. New chromosome numbers for plant taxa endemic to the  
462 Balearic Islands. *Folia Geobot.* 41: 433–451.
- 463 **Cellinese, N., Smith, S.A., Edwards, E.J., Kim, S.-T., Haberle, R.C., Avramakis, M. &**  
464 **Donoghue, M.J.** 2009. Historical biogeography of the endemic Campanulaceae of Crete. *J.*  
465 *Biogeogr.* 36: 1253–1269. <http://dx.doi.org/10.1111/j.1365-2699.2008.02077.x>
- 466 **Cullings, K.** 1992. Design and testing of a plant-specific PCR primer for ecological and  
467 evolutionary studies. *Molec. Ecol.* 1: 233–240. <http://dx.doi.org/10.1111/j.1365-294X.1992.tb00182.x>
- 469 **Doyle, J.J. & Doyle, J.L.** 1987. A rapid DNA isolation procedure for small quantities of fresh leaf  
470 tissue. *Phytochem. Bull. Bot. Soc. Amer.* 19: 11–15.
- 471 **Drummond, A.J., Ho, S.Y.W., Phillips, M.J. & Rambaut, A.** 2006. Relaxed phylogenetics and

- 472 dating with confidence. *PLoS Biol.* 4: e88. <http://dx.doi.org/10.1371/journal.pbio.0040088>
- 473 **Eldenäs, P., Källersjö, M. & Anderberg, A.** 1999. Phylogenetic placement and circumscription of  
474 Tribes Inuleae s. str. and Plucheeae (Asteraceae): evidence from sequences of chloroplast gene  
475 *ndhF*. *Molec. Phylogen. Evol.* 13: 50–58. <http://dx.doi.org/10.1006/mpev.1999.0635>
- 476 **Fiz-Palacios, O. & Valcárcel, V.** 2013. From Messinian crisis to Mediterranean climate: A  
477 temporal gap of diversification recovered from multiple plant phylogenies. *Perspect. Pl. Ecol.*  
478 15: 130–137. <http://dx.doi.org/10.1016/j.ppees.2013.02.002>
- 479 **Forest, F.** 2009. Calibrating the Tree of Life: Fossils, molecules and evolutionary timescales. *Ann.*  
480 *Bot.* 104: 789–794. <http://dx.doi.org/10.1093/aob/mcp192>
- 481 **Futuyma, D.** 2005. *Evolution*. Massachusetts: Sinauer Associates.
- 482 **Galbany-Casals, M., Carnicero-Campmany, P., Blanco-Moreno, J.M. & Smissen, R.D.** 2012.  
483 Morphological and genetic evidence of contemporary intersectional hybridisation in  
484 Mediterranean *Helichrysum* (Asteraceae, Gnaphalieae). *Pl. Biol.* 14: 789–800.  
485 <http://dx.doi.org/10.1111/j.1438-8677.2012.00568.x>
- 486 **Galbany-Casals, M., Garcia-Jacas, N., Sáez, L., Benedí, C. & Susanna, A.** 2009. Phylogeny,  
487 biogeography, and character evolution in Mediterranean, Asiatic, and Macaronesian  
488 *Helichrysum* (Asteraceae, Gnaphalieae) inferred from nuclear phylogenetic analyses. *Int. J. Pl.*  
489 *Sci.* 170: 365–380. <http://dx.doi.org/10.1086/596332>
- 490 **Gao, Q.-B., Li, Y.-H., Gornall, R.J., Zhang, Z.-X., Zhang, F.-Q., Xing, R., Fu, P.-C., Wang, J.-**  
491 **L., Liu, H.-R., Tian, Z.-Z. & Chen, S.-L.** 2015. Phylogeny and speciation in *Saxifraga* sect.  
492 *Ciliatae* (Saxifragaceae): Evidence from *psbA-trnH*, *trnL-F* and ITS sequences. *Taxon.* 64:  
493 703–713. <http://dx.doi.org/10.12705/644.3>
- 494 **Garcia-Jacas, N., & Susanna, A.** (1992). Karyological notes on *Centaurea* sect. *Acrocentron*  
495 (Asteraceae). *Pl. Syst. Evol.* 179: 1–18. <http://doi.org/10.1007/BF00938015>

- 496 **Gaudeul, M., Véla, E. & Rouhan, G.** 2016. Eastward colonization of the Mediterranean Basin by  
497 two geographically structured clades: The case of *Odontites* Ludw. (Orobanchaceae). *Molec.*  
498 *Phylogen. Evol.* 96: 140–149. <http://dx.doi.org/10.1016/j.ympev.2015.12.008>
- 499 **Gernhard, T.** 2008. The conditioned reconstructed process. *J. Theor. Biol.* 253: 769–778.  
500 <http://dx.doi.org/10.1016/j.jtbi.2008.04.005>
- 501 **Ghebrehiwet, M., Bremer, B. & Thulin, M.** 2000. Phylogeny of the tribe Antirrhineae  
502 (Scrophulariaceae) based on morphological and *ndhF* sequence data. *Pl. Syst. Evol.* 220: 223–  
503 239. <http://dx.doi.org/10.1007/BF00985047>
- 504 **Gillespie, R.G., Baldwin, B.G., Waters, J.M., Fraser, C.I., Nikula, R. & Roderick, G.K.** 2012.  
505 Long-distance dispersal: A framework for hypothesis testing. *Trends Ecol. Evol.* 27: 47–55.  
506 <http://dx.doi.org/10.1016/j.tree.2011.08.009>
- 507 **Greuter, W.** 1991. Botanical diversity, endemism, rarity, and extinction in the Mediterranean area:  
508 an analysis based on the published volumes of the Med-Checklist. *Bot. Chron. (Patras)* 10:  
509 63–79.
- 510 **Guisan, A. & Thuiller, W.** 2005. Predicting species distribution: offering more than simple habitat  
511 models. *Ecol. Lett.* 8: 993–1009. <http://dx.doi.org/10.1111/j.1461-0248.2005.00792.x>
- 512 **Guzmán, B., Gómez, J.M. & Vargas, P.** 2015. Bees and evolution of occluded corollas in  
513 snapdragons and relatives (Antirrhineae). *Perspect. Plant Ecol. Evol. Syst.* 17: 467–475.  
514 <http://dx.doi.org/10.1016/j.ppees.2015.07.003>
- 515 **Hardion, L., Dumas, P.-J., Abdel-Samad, F., Bou Dagher Kharrat, M., Surina, B., Affre, L.,**  
516 **Médail, F., Bacchetta, G. & Baumel, A.** 2016. Geographical isolation caused the  
517 diversification of the Mediterranean thorny cushion-like *Astragalus* L. sect. *Tragacantha* DC.  
518 (Fabaceae). *Molec. Phylogen. Evol.* 97: 187–195.  
519 <http://dx.doi.org/10.1016/j.ympev.2016.01.006>

- 520 **Hilpold, A., Schönswetter, P., Susanna, A., Garcia-Jacas, N. & Vilatersana, R.** 2011. Evolution  
521 of the central Mediterranean *Centaurea cineraria* group (Asteraceae): Evidence for relatively  
522 recent, allopatric diversification following transoceanic seed dispersal. *Taxon* 60: 528–538.
- 523 **Hilpold, A., Vilatersana, R., Susanna, A., Meseguer, A.S., Boršić, I., Constantinidis, T.,**  
524 **Filigheddu, R., Romaschenko, K., Suárez-Santiago, V.N., Tugay, O., Uysal, T., Pfeil, B.E.**  
525 **& Garcia-Jacas, N.** 2014. Phylogeny of the *Centaurea* group (*Centaurea*, Compositae) -  
526 Geography is a better predictor than morphology. *Molec. Phylogen. Evol.* 77: 195–215.  
527 <http://dx.doi.org/10.1016/j.ympev.2014.04.022>
- 528 **Janssens, S.B., Groeninckx, I., De Block, P.J., Verstraete, B., Smets, E.F. & Dessein, S.** 2016.  
529 Dispersing towards Madagascar: Biogeography and evolution of the Madagascan endemics of  
530 the Spermaceae tribe (Rubiaceae). *Molec. Phylogen. Evol.* 95: 58–66.  
531 <http://dx.doi.org/10.1016/j.ympev.2015.10.024>
- 532 **Kay, K.M., Whittall, J.B. & Hodges, S.** 2006. A survey of nuclear ribosomal internal transcribed  
533 spacer substitution rates across angiosperms: an approximate molecular clock with life history  
534 effects. *BMC Evol. Biol.* 6. <http://dx.doi.org/10.1186/1471-2148-6-36>
- 535 **Kim, K. & Jansen, R.** 1995. *ndhF* sequence evolution and the major clades in the sunflower  
536 family. *Proc. Natl. Acad. Sci. U. S. A.* 92: 10379–10383.
- 537 **Kodandaramaiah, U.** 2010. Use of dispersal-vicariance analysis in biogeography - a critique. *J.*  
538 *Biogeogr.* 37: 3–11. <http://dx.doi.org/10.1111/j.1365-2699.2009.02221.x>
- 539 **Kubo, T. & Iwasa, Y.** 1995. Inferring the rates of branching and extinction from molecular  
540 phylogenies. *Evolution* 49: 694–704. <http://dx.doi.org/10.2307/2410323>
- 541 **Kutnjak, D., Kuttner, M., Niketić, M., Dullinger, S., Schönswetter, P. & Frajman, B.** (2014).  
542 Escaping to the summits: Phylogeography and predicted range dynamics of *Cerastium*  
543 *dinaricum*, an endangered high mountain plant endemic to the western Balkan Peninsula.

- 544 *Molecular Phylogenetics and Evolution*, 78: 365–374. [http://](http://dx.doi.org/10.1016/j.ympev.2014.05.015)  
545 [dx.doi.org/10.1016/j.ympev.2014.05.015](http://dx.doi.org/10.1016/j.ympev.2014.05.015)
- 546 **Landis, M., Matzke, N., Mooer, B. & Huelsenbeck, J.** 2013. Bayesian analysis of biogeography  
547 when the number of area is large. *Syst. Biol.* 62: 789–804.  
548 <http://dx.doi.org/10.1093/sysbio/syt040>
- 549 **Lanfear, R., Calcott, B., Ho, S.Y.W. & Guindon, S.** 2012. Partitionfinder: combined selection of  
550 partitioning schemes and substitution models for phylogenetic analyses. *Molec. Biol. Evol.* 29:  
551 1695–701. <http://dx.doi.org/10.1186/1471-2148-14-82>
- 552 **Linder, H.P. & Barker, N.P.** 2014. Does polyploidy facilitate long-distance dispersal? *Ann. Bot.*  
553 113: 1175–1183. <http://dx.doi.org/10.1111/jbi.12276>
- 554 **Maddison, W.P. & Knowles, L.L.** 2006. Inferring phylogeny despite incomplete lineage sorting.  
555 *Syst. Biol.* 55: 21–30. <http://dx.doi.org/10.1080/10635150500354928>
- 556 **Marcussen, T., Heier, L., Brysting, A.K., Oxelman, B. & Jakobsen, K.S.** 2015. From gene trees  
557 to a dated allopolyploid network: Insights from the angiosperm genus *Viola* (Violaceae). *Syst.*  
558 *Biol.* 64: 84–101. <http://dx.doi.org/10.1093/sysbio/syu071>
- 559 **Matzke, N.J.** 2013. Probabilistic historical biogeography: new models for founder-event speciation,  
560 imperfect detection, and fossils allow improved accuracy and model-testing. *Frontiers*  
561 *Biogeogr.* 5: 242–248. <http://dx.doi.org/10.5811/westjem.2011.5.6700>
- 562 **Markos, S. & Baldwin, B.G.** 2001. Higher-level relationships and major lineages of *Lessingia*  
563 (Compositae, Astereae) based on nuclear rDNA Internal and External Transcribed Spacer (ITS  
564 and ETS) sequences. *Syst. Bot.* 26: 168–183. <http://dx.doi.org/10.1043/0363-6445-26.1.168>
- 565 **Médail, F. & Diadema, K.** 2009. Glacial refugia influence plant diversity patterns in the  
566 Mediterranean Basin. *J. Biogeogr.* 36: 1333–1345. [http://dx.doi.org/10.1111/j.1365-](http://dx.doi.org/10.1111/j.1365-2699.2008.02051.x)  
567 [2699.2008.02051.x](http://dx.doi.org/10.1111/j.1365-2699.2008.02051.x)
- 568 **Molins, A., Bacchetta, G., Rosato, M., Rosselló, J.A. & Mayol, M.** 2011. Molecular

- 569 phylogeography of *Thymus herba-barona* (Lamiaceae): Insight into the evolutionary history of  
570 the flora of the western Mediterranean islands. *Taxon* 60: 1295–1305.
- 571 **Nee, S., Holmes, E.C., May, R.M. & Harvey, P.H.** 1994. Extinction rates can be estimated from  
572 molecular phylogenies. *Philos. T. R. Soc. B* 344: 77–82.  
573 <http://dx.doi.org/10.1098/rstb.1994.0054>
- 574 **Nee, S.** 2001. Inferring speciation rates from phylogenies. *Evolution* 55: 661–668.  
575 <http://dx.doi.org/10.1111/j.0014-3820.2001.tb00801.x>
- 576 **Nie, Z.-L., Funk, V.A., Meng, Y., Deng, T., Sun, H. & Wen, J.** 2015. Recent assembly of the  
577 global herbaceous flora: the paper daisies (Asteraceae: Gnaphalieae). *New Phytol.* 209: 1795-  
578 1806. <http://dx.doi.org/10.1111/nph.13740>
- 579 **Nieto Feliner, G.** 2014. Patterns and processes in plant phylogeography in the Mediterranean Basin.  
580 A review. *Perspect. Pl. Ecol.* 16: 265–278. <http://dx.doi.org/10.1016/j.ppees.2014.07.002>
- 581 **Olmstead, R.G., DePamphilis, C.W., Wolfe, A.D., Young, N.D., Elisons, W.J., Reeves, P.A. &**  
582 **Hedren, L.A.** 2001. Disintegration of the Scrophulariaceae. *Am. J. Bot.* 88: 348–361.
- 583 **Onnis, A. & Floris, C.** 1967. Il numero cromosomico di *Linaria mulleri* Moris. *Atti Soc. Tosc. Sci.*  
584 *Nat. Pisa, ser. B* 74: 76–81.
- 585 **Papadopulos, A.S.T., Kaye, M., Devaux, C., Hipperson, H., Lighten, J., Luke, T.D., Hutton, I.,**  
586 **Baker, W.J., Butlin, R.K., Savolainen, V. & Dunning, L.T.** 2014. Evaluation of genetic  
587 isolation within an island flora reveals unusually widespread local adaptation and supports  
588 sympatric speciation. *Philos. T. R. Soc. B* 369: 20130342.  
589 <http://dx.doi.org/10.1098/rstb.2013.0342>
- 590 **Paradis, E., Claude, J. & Strimmer, K.** 2004. APE: analyses of phylogenetics and evolution in R  
591 language. *Bioinformatics* 20: 289–290. <http://dx.doi.org/10.1093/bioinformatics/btg412>
- 592 **Pignatti, S.** 1982. *Flora d'Italia*. Bologna: Edagricole.
- 593 **Polunin, O.** 1980. *Flowers of Greece and the Balkans*. Oxford: Oxford University Press.



- 594 **Rabosky, D.L.** 2006a. Likelihood methods for detecting temporal shifts in diversification rates.  
595 *Evolution* 60: 1152–1164. <http://dx.doi.org/10.1554/05-424.1>
- 596 **Rabosky, D.L.** 2006b. LASER: a maximum likelihood toolkit for detecting temporal shifts in  
597 diversification rates from molecular phylogenies. *Evol. Bioinform. Online* 2: 273–276.  
598 <http://dx.doi.org/10.1554/05-424.1>
- 599 **Rambaut, A., Suchard, M.A., Xie, W. & Drummond, J.A.** 2013. Tracer 1.6. University of  
600 Edinburgh, Edinburgh. Available at: <http://beast.bio.ed.ac.uk/>.
- 601 **Ramsey, J.** 2011. Polyploidy and ecological adaptation in wild yarrow. *Proc. Natl. Acad. Sci. U. S.*  
602 *A.* 108: 7096–7101. <http://dx.doi.org/10.1073/pnas.1016631108>
- 603 **Ree, R.H., Moore, B.R., Webb, C.O. & Donoghue, M.J.** 2005. A likelihood framework for  
604 inferring the evolution of geographic range on phylogenetic trees. *Evolution* 59: 2299–2311.  
605 <http://dx.doi.org/10.1111/j.0014-3820.2005.tb00940.x>
- 606 **Ree, R.H. & Smith, S.A.** 2008. Maximum likelihood inference of geographic range evolution by  
607 dispersal, local extinction, and cladogenesis. *Syst. Biol.* 57: 4–14.  
608 <http://dx.doi.org/10.1080/10635150701883881>
- 609 **Riina, R., Peirson, J.A., Geltman, D.V, Molero, J., Frajman, B., Pahlevani, A., Barres, L.,**  
610 **Morawetz, J.J., Salmaki, Y., Zarre, S., Kryukov, A., Bruyns, P.V. & Berry, P.E.** 2013. A  
611 worldwide molecular phylogeny and classification of the leafy spurges, *Euphorbia* subgenus  
612 *Esula* (Euphorbiaceae). *Taxon* 62: 316–342. <http://dx.doi.org/10.12705/622.3>
- 613 **Rivas-Martínez, S., Penas, A. & Díaz, T.E.** 2004. *Biogeographic Map of Europe*. León:  
614 Cartographic Service, University of León.
- 615 **Ronquist, F.** 1996. DIVA ver. 1.1. Computer manual. Available from [http://](http://www.ebc.uu.se/systzoo/research/diva/diva.html)  
616 [www.ebc.uu.se/systzoo/research/diva/diva.html](http://www.ebc.uu.se/systzoo/research/diva/diva.html). Uppsala, Sweden: Evolutionary Biology  
617 Centre, Uppsala University.
- 618 **Ronquist, F.** 1997. Dispersal-Vicariance Analysis: A New Approach to the Quantification of

- 619 Historical Biogeography. *Syst. Biol.* 46: 195–203. <http://dx.doi.org/10.1093/sysbio/46.1.195>
- 620 **Ronquist, F., Teslenko, M., van der Mark, P., Ayres, D.L., Darling, A., Höhna, S., Larget, B.,**  
621 **Liu, L., Suchard, M.A. & Huelsenbeck, J.P.** 2012. MrBayes 3.2: efficient Bayesian  
622 phylogenetic inference and model choice across a large model space. *Syst. Biol.* 61: 539–542.  
623 <http://dx.doi.org/10.1093/sysbio/sys029>
- 624 **Santos-Gally, R., Vargas, P. & Arroyo, J.** 2011. Insights into Neogene Mediterranean  
625 biogeography based on phylogenetic relationships of mountain and lowland lineages of  
626 *Narcissus* (Amaryllidaceae). *J. Biogeogr.* 39: 782–798. <http://dx.doi.org/10.1111/j.1365->  
627 [2699.2011.02526.x](http://dx.doi.org/10.1111/j.1365-2699.2011.02526.x)
- 628 **Schwarz, G.** 1978. Estimating the dimension of a model. *Ann. Stat.* 6: 461–464.  
629 <http://dx.doi.org/10.1214/aos/1176344136>
- 630 **Shaw, J., Lickey, E.B., Schilling, E.E. & Small, R.L.** 2007. Comparison of whole chloroplast  
631 genome sequences to choose noncoding regions for phylogenetic studies in angiosperms: the  
632 tortoise and the hare III. *Am. J. Bot.* 94: 275–288. <http://dx.doi.org/10.3732/ajb.94.3.275>
- 633 **Simmons, M. P. & Ochoterena, H.** 2000. Gaps as characters in sequence-based phylogenetic  
634 analyses. *Syst. Biol.* 49: 369–381.
- 635 **Soltis, D., Soltis, P. & Doyle, J.** 1998. *Molecular systematics of plants II: DNA sequencing.*  
636 Boston: Kluwer Academic.
- 637 **Speranza, F., Villa, I.M., Sagnotti, L., Florindo, F., Cosentino, D., Cipollari, P. & Mattei, M.**  
638 2002. Age of the Corsica–Sardinia rotation and Liguro–Provençal Basin spreading: new  
639 paleomagnetic and Ar/Ar evidence. *Tectonophysics* 347: 231–251.  
640 [http://dx.doi.org/10.1016/S0040-1951\(02\)00031-8](http://dx.doi.org/10.1016/S0040-1951(02)00031-8)
- 641 **Speta, F.** 1986. Heterokarpidie, Dehiszenz, Heterospermie und basifixe Samen bei *Cymbalaria* Hill.  
642 (Scrophulariaceae) und systematische Schlußfolgerungen. *Phyton* 26: 23–57.
- 643 **Speta, F.** 1989. Zur Morphologie und Karyologie von *Cymbalaria ebelii* Cufod. (Scrophulariaceae).

- 644 *Phyton* 29: 247–254.
- 645 **Sun, Y., Skinner, D.Z., Liang, G.H. & Hulbert, S.H.** 1994. Phylogenetic analysis of *Sorghum* and  
646 related taxa using internal transcribed spacers of nuclear ribosomal DNA. *Theor. Appl. Genet.*  
647 89: 26–32. <http://dx.doi.org/10.1007/BF00226978>
- 648 **Surina, B., Schneeweiss, G.M., Glasnović, P. & Schönswetter, P.** 2014. Testing the efficiency of  
649 nested barriers to dispersal in the Mediterranean high mountain plant *Edraianthus*  
650 *graminifolius* (Campanulaceae). *Molec. Ecol.* 23: 2861–2875.  
651 <http://dx.doi.org/10.1111/mec.12779>
- 652 **Sutton, D.A.** 1988. *A revision of the tribe Antirrhineae*. London: British Museum (Natural History).
- 653 **Swofford, D.** 2002. PAUP\*: Phylogenetics analysis using parsimony (\*and other methods), version  
654 4.0 beta 10. Sinauer, Sunderland.
- 655 **Takhtajan, A.** 1986. *Floristic regions of the world*. Berkeley: University of California Press.
- 656 **Tamura, K., Stecher, G. & Peterson, D.** 2013. MEGA6: molecular evolutionary genetics analysis  
657 version 6.0. *Molec. Biol. Evol.* 30: 2725–2729. <http://dx.doi.org/10.1093/molbev/mst197>
- 658 **Tel-Zur, N., Abbo, S., Myslabodski, D. & Mizrahi, Y.** 1999. Modified CTAB procedure for DNA  
659 isolation from epiphytic cacti of the genera *Hylocereus* and *Selenicereus* (Cactaceae). *Pl.*  
660 *Molec. Biol.* 17: 249–254. <http://dx.doi.org/10.1023/A:1007656315275>
- 661 **Thompson, J.D.** 2005. *Plant evolution in the Mediterranean*. Oxford: Oxford University Press.
- 662 **Vargas, P.** 2003. Molecular evidence for multiple diversification patterns of alpine plants in  
663 Mediterranean Europe. *Taxon* 52: 463–476.
- 664 **Vargas, P., Rosselló, J.A., Oyama, R. & Güemes, J.** 2004. Molecular evidence for naturalness of  
665 genera in the tribe Antirrhineae (Scrophulariaceae) and three independent evolutionary  
666 lineages from the New World and the Old. *Pl. Syst. Evol.* 249: 151–172.  
667 <http://dx.doi.org/10.1007/s00606-004-0216-1>
- 668 **Vargas, P., Valente, L.M., Blanco-Pastor, J.L., Liberal, I., Guzmán, B., Cano, E., Forrest, A. &**

- 669        **Fernández-Mazuecos, M.** 2013. Testing the biogeographical congruence of palaeofloras using  
670        molecular phylogenetics: snapdragons and the Madrean-Tethyan flora. *J. Biogeogr.* 41: 932–  
671        943. <http://dx.doi.org/10.1111/jbi.12253>
- 672        **Verlaque, R., Contandriopoulos, J. & Aboucaya, A.** 1993. Recherches cyto-biogéographiques sur  
673        quelques taxons rares ou endémiques de Corse: I. *Candollea* 48: 562–576.
- 674        **Vitales, D., Garnatje, T., Pellicer, J., Vallès, J., Santos-Guerra, A. & Sanmartín, I.** 2014. The  
675        explosive radiation of *Cheirolophus* (Asteraceae, Cardueae) in Macaronesia. *B.M.C. Evol.*  
676        *Biol.* 14: 118. <http://dx.doi.org/10.1186/1471-2148-14-118>
- 677        **Wendel, J.F., Schnabel, A. & Seelanan, T.** 1995. Bidirectional interlocus concerted evolution  
678        following allopolyploid speciation in cotton (*Gossypium*). *Proc. Natl. Acad. Sci. U. S. A.* 92:  
679        280–284. <http://dx.doi.org/10.1073/pnas.92.1.280>
- 680        **Wood, T.E., Takebayashi, N., Barker, M.S., Mayrose, I., Greenspoon, P.B. & Rieseberg, L.H.**  
681        2009. The frequency of polyploid speciation in vascular plants. *Proc. Natl. Acad. Sci. U. S. A.*  
682        106: 13875–9. <http://dx.doi.org/10.1073/pnas.0811575106>
- 683
- 684

**Table 1.** Chromosome number and ecology of the 16 sampled taxa.

| <b>Taxon</b>                                                          | <b>Chromosome number</b> | <b>Ecology</b>                                                  |
|-----------------------------------------------------------------------|--------------------------|-----------------------------------------------------------------|
| <i>C. aequitriloba</i> (Viv.) A. Chev.                                | $2n = 42, 56^1$          | Coastal and inland shadowed cliffs, moist rocks on stream banks |
| <i>C. fragilis</i> (Rodrig.) A. Chev.                                 | $2n = 56^2$              | Coastal and inland shadowed cliffs                              |
| <i>C. glutinosa</i> Bigazzi & Raffaelli subsp. <i>glutinosa</i>       | $2n = 14^3$              | Coastal and inland shadowed cliffs, walls                       |
| subsp. <i>brevicalcarata</i> Bigazzi & Raffaelli                      | $2n = 14^3$              | Coastal and inland shadowed cliffs, walls                       |
| <i>C. hepaticifolia</i> Wettst.                                       | $2n = 56^1$              | High-elevation rocks, moist rocks and mountain stream banks     |
| <i>C. longipes</i> (Boiss. & Heldr.) A. Chev.                         | $2n = 14^1$              | Coastal cliffs, rocks and walls                                 |
| <i>C. microcalyx</i> (Boiss.) Wettst. subsp. <i>microcalyx</i>        | $2n = 28^4$              | Inland shadowed cliffs, walls                                   |
| subsp. <i>acutiloba</i> (Boiss. & Heldr.) Greuter                     | ?                        | Inland shadowed cliffs                                          |
| subsp. <i>dodekanesi</i> Greuter                                      | $2n = 28^5$              | Inland shadowed cliffs                                          |
| subsp. <i>ebelii</i> (Cufod.) Cufod.                                  | $2n = 28^6$              | Inland shadowed cliffs, walls                                   |
| subsp. <i>minor</i> (Cufod.) Greuter                                  | $2n = 28^1$              | Inland shadowed cliffs                                          |
| <i>C. muelleri</i> (Moris.) A. Chev.                                  | $2n = 42^7$              | Inland overhanging cliffs                                       |
| <i>C. muralis</i> G. Gaertn., B. Mey. & Scherb. subsp. <i>muralis</i> | $2n = 14^1$              | Inland shadowed cliffs, walls                                   |
| subsp. <i>visianii</i> (Jáv.) D.A. Webb                               | $2n = 14^3$              | Inland shadowed cliffs, walls                                   |
| <i>C. pallida</i> Wettst.                                             | $2n = 14^1$              | High-elevation rocks, mountain stream banks                     |
| <i>C. pubescens</i> (J. Presl & C. Presl) Cufod.                      | $2n = 28^3$              | Inland shadowed cliffs, walls                                   |

<sup>1</sup> Sutton (1988) and references therein.<sup>2</sup> Castro & Rosselló (2006).<sup>3</sup> Bigazzi & Raffaelli (2000).<sup>4</sup> Speta (1986).<sup>5</sup> P. Carnicero, unpublished data.<sup>6</sup> Speta (1989).<sup>7</sup> Onnis & Floris (1967).

## FIGURE CAPTIONS

**Figure 1.** Distributions of *Cymbalaria* taxa, based on Sutton (1988), local Floras, personal field observations and herbarium vouchers. When the information on the areas of distribution of subspecies was not accurate or the overlap was considerable, the general distribution area for the species is shown. For *Cymbalaria muralis*, which is widely naturalized in temperate regions, the approximate natural distribution is shown. Different line formats indicate ploidy levels: solid line for diploids, dashed line for tetraploids and dotted line for hexa- to octoploids. Ploidy level for *C. microcalyx* subsp. *acutiloba* is not known, but we assumed it to be the same as other *C. microcalyx* subspecies.

**Figure 2.** Maximum clade credibility (MCC) tree produced with a relaxed molecular clock analysis of the nrDNA for the genus *Cymbalaria* in BEAST2. Node bars represent the 95% highest posterior density intervals for the divergence time estimates of the clades that are discussed in the main text. Bayesian posterior probabilities  $\geq 0.95$ /bootstrap support values  $\geq 70\%$  are indicated. Ploidy levels are indicated to the right of the terminal names. The numbers in italics under nodes indicate the node number. Pie charts at each node show the marginal probabilities of alternative ancestral ranges obtained from the BioGeoBEARS analysis and are shown only for the nodes discussed in the main text. Letter codes for each area inferred and distribution areas at present are indicated in the nodes and terminals, respectively. Black in pie charts represents ancestral ranges with a probability  $< 5\%$ . The inset shows a lineage-through-time plot for *Cymbalaria*, based on 1000 trees randomly sampled from the posterior distribution of the dating analysis of data set 3. The thick line corresponds to the MCC tree.

**Figure 3.** Phylogram from the Bayesian analysis of the cpDNA for the genus *Cymbalaria*. Bayesian posterior probabilities  $\geq 0.95$ /bootstrap support values  $\geq 70\%$  are indicated. The double slashes at the base of the tree indicate that respective branches have been manually shortened.

Figure

[Click here to download Figure fig 1.pdf](#)

1. *C. fragilis*
2. *C. hepaticifolia*
3. *C. muelleri*
4. *C. aequitriloba*
5. *C. pubescens*
6. *C. pallida*
7. *C. glutinosa* subsp. *glutinosa*
8. *C. glutinosa* subsp. *brevicalcarata*
9. *C. muralis* subsp. *muralis*
10. *C. muralis* subsp. *visianii*
11. *C. microcalyx* subsp. *ebelii*
12. *C. microcalyx* subsp. *microcalyx*
13. *C. microcalyx* subsp. *minor*
14. *C. microcalyx* subsp. *dodekanesii*
15. *C. microcalyx* subsp. *acutiloba*
16. *C. longipes*

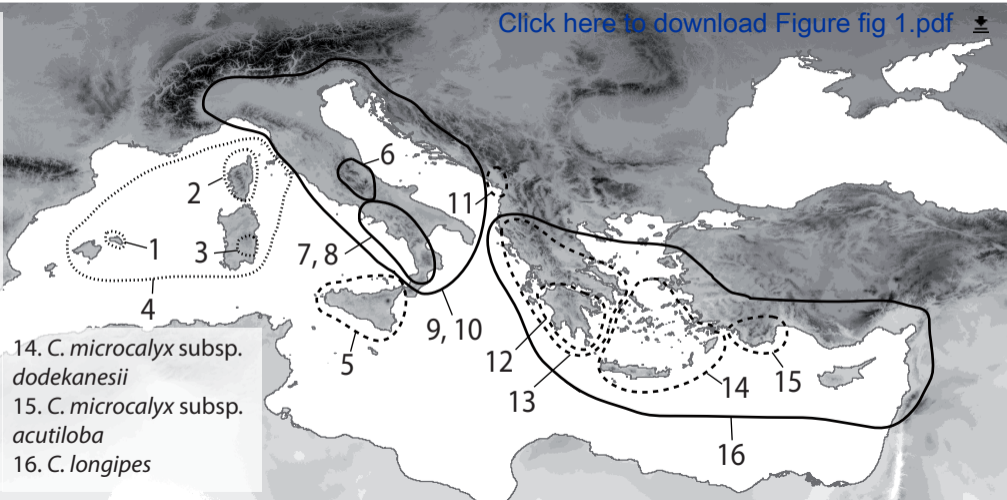

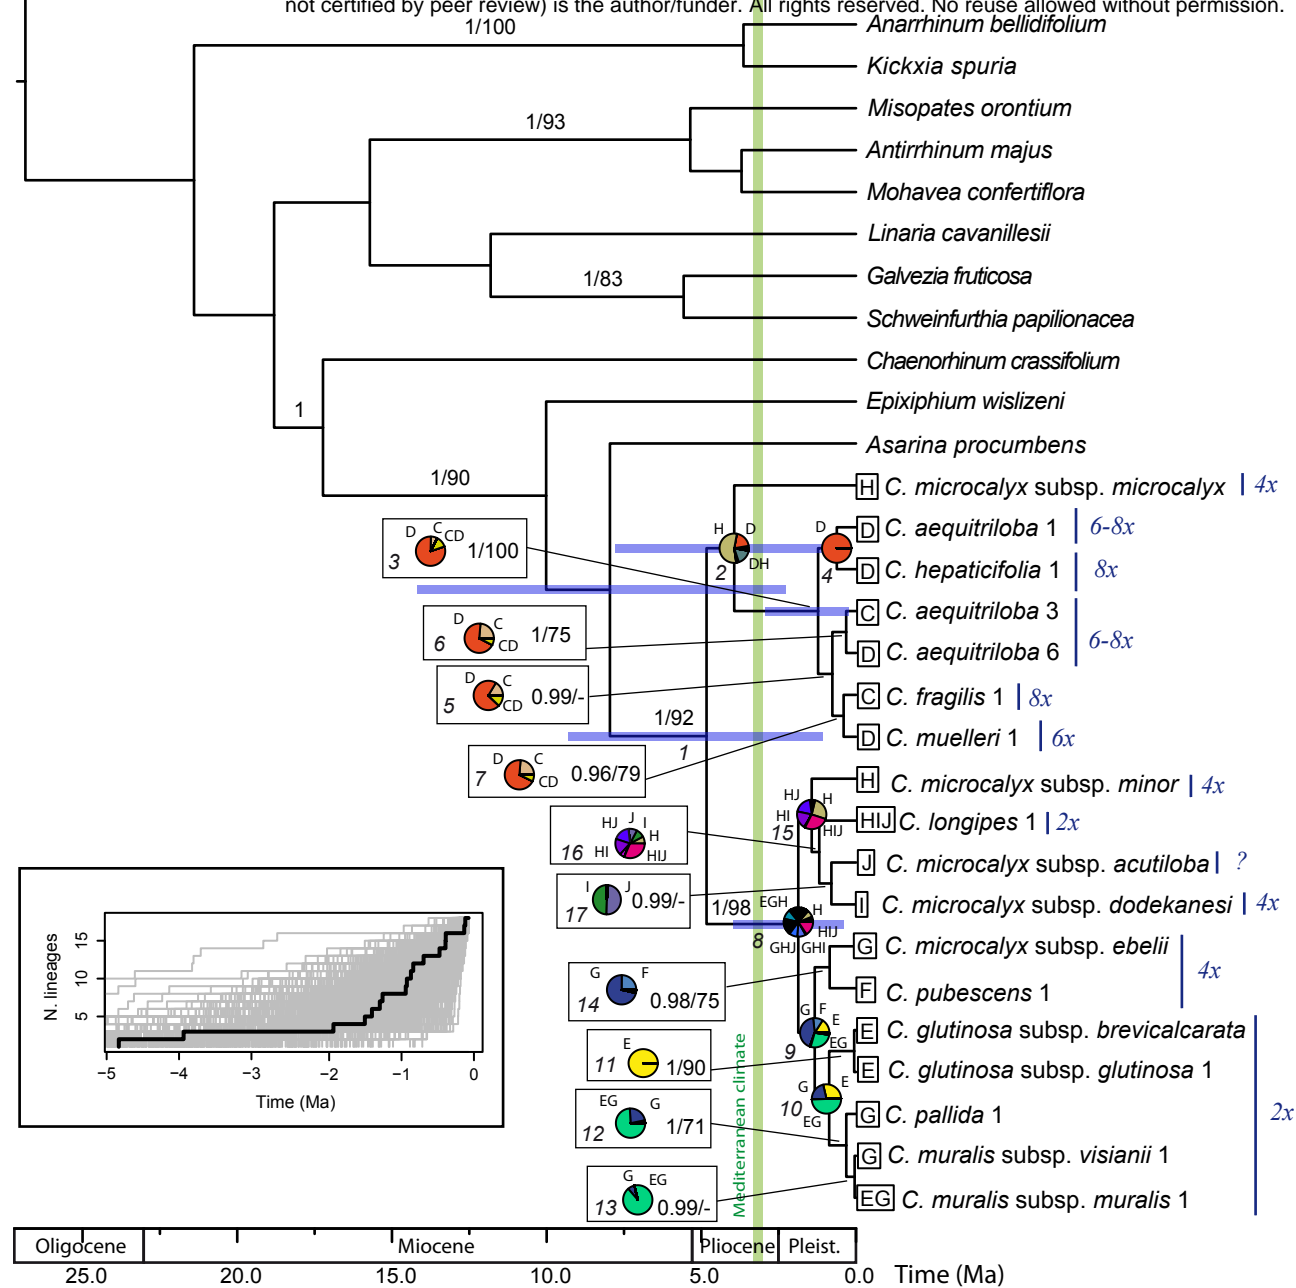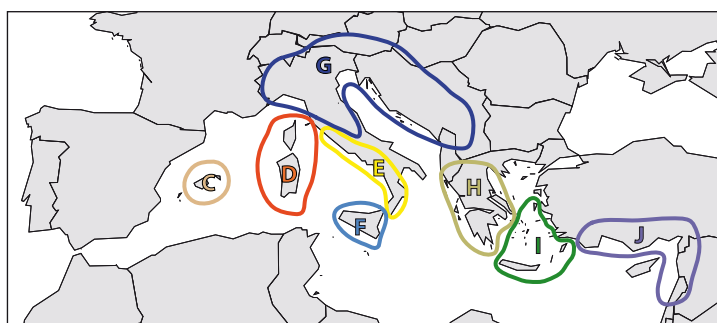

- C:** Balearic Islands
- D:** Corsica and Sardinia
- E:** southern Italian Peninsula
- F:** Sicily
- G:** northern Italian and Balkan Peninsulas
- H:** Greek Peninsula
- I:** Aegean Islands
- J:** Anatolia, Lebanon and Syria shores



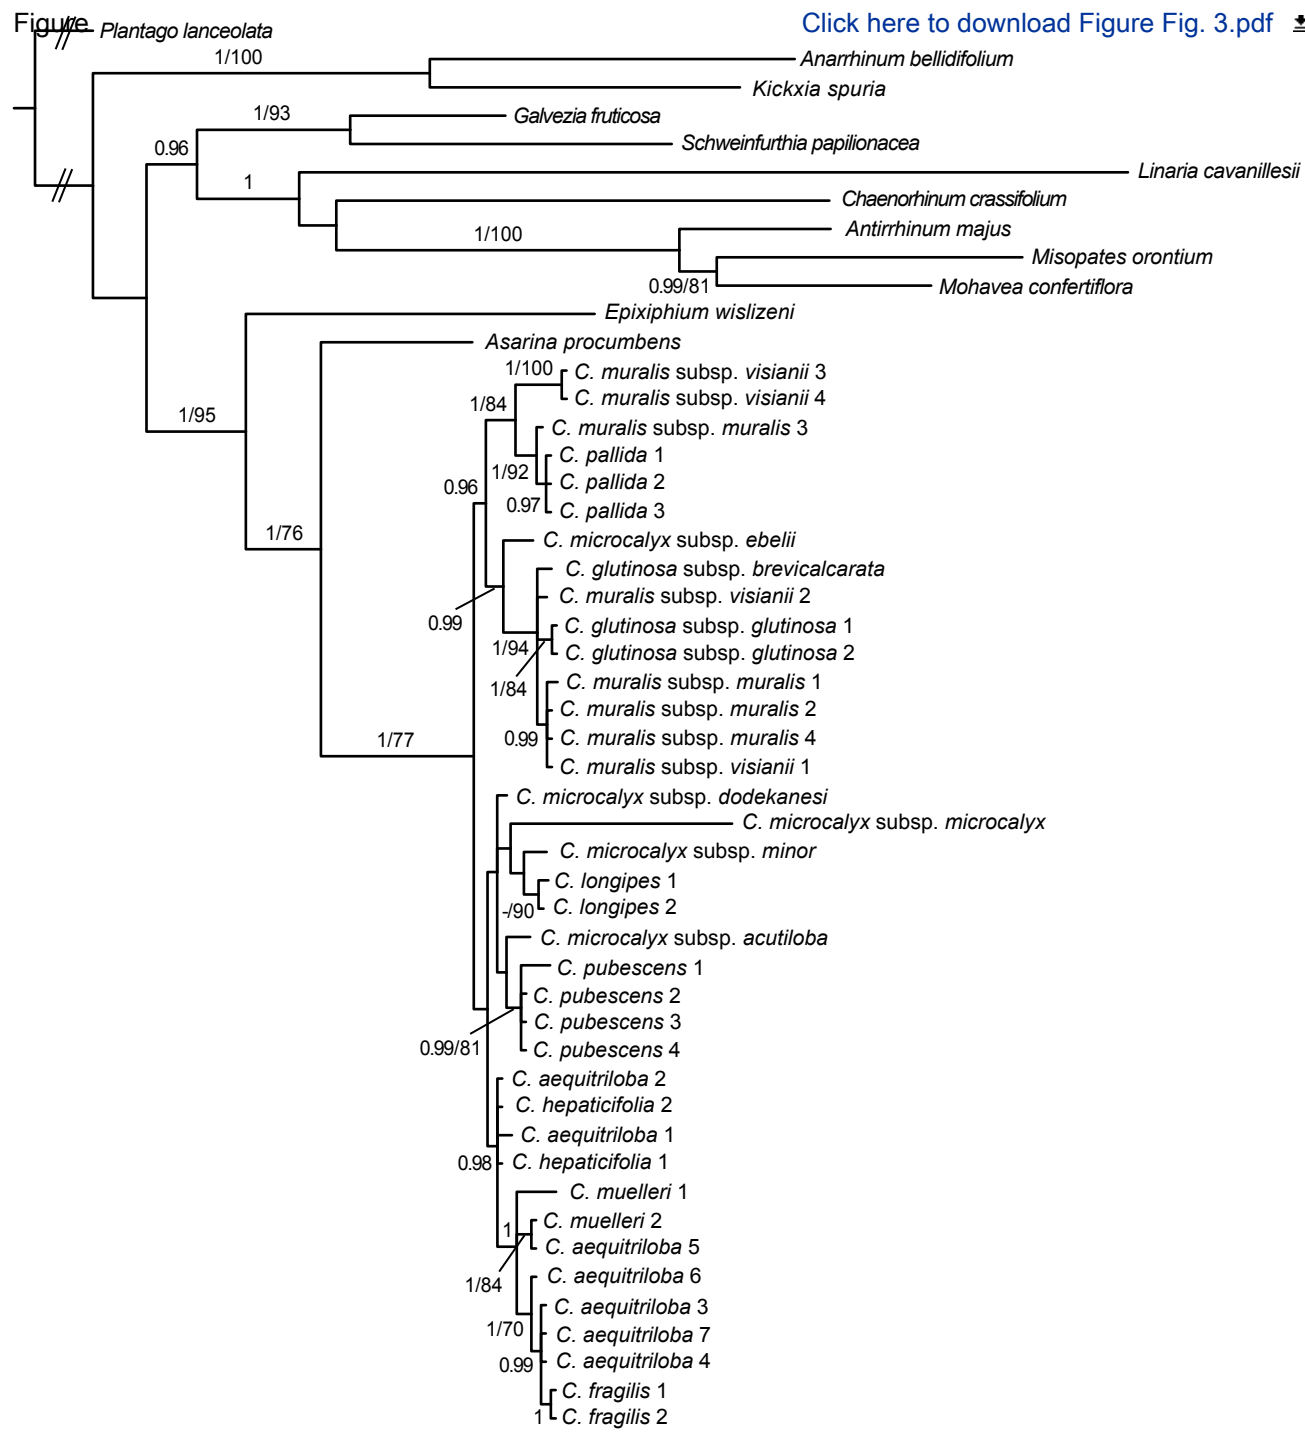

**Appendix 1.** Sampled specimens with information on the individual numeric codes used in text and figures, locality, herbarium voucher and accession numbers of the regions analysed. A dash (–) indicates sequences that were not obtained in the present study or specimens without individual numeric code.

Taxon, individual number, locality, voucher, GenBank acc. no. ITS, 3'ETS, *ndhF*, *rpl32-trnL*

*Cymbalaria* Hill: *C. aequitriloba* (Viv.) A. Chev., 1, France, Corsica, La Castagniccia, A. Curcò (BCN 86695), KP735225, KP851084, KP851014, KP851100; *C. aequitriloba*, 2, France, Corsica, La Castagniccia, A. Hilpold s. n. (BOZ 8888), KP735224, KP851085, KP851011, KP851097; *C. aequitriloba*, 3, Spain, Balearic Islands, Mallorca, Puig Major, X. Rotllan (no voucher), KP735219, KP851088, KP851007, KP851093; *C. aequitriloba*, 4, Spain, Balearic Islands, Mallorca, Formentor, L. Sáez 7366 & X. Rotllan (BC), KP735240, KP851086, KP851009, KP851095; *C. aequitriloba*, 5, Italy, Sardinia, Nuoro, Badde Salighes, C. Aedo 9213 (MA 708824), KP735220, KP851087, KP851026, KP851111; *C. aequitriloba*, 6, Italy, Sardinia, Cuglieri, Mte. Ferru, C. Navarro 4683 & al. (MA 708259), KP735222, --, KP851006, KP851092; *C. aequitriloba*, 7, Spain, Balearic Islands, Cabrera, L. Sáez 6196 & L. Guàrdia Valle (BC), KP735241, KP851082, KP851008, KP851094; *C. fragilis* (J. J. Rodr.) A. Chev., 1, Spain, Balearic Islands, Menorca, Barranc d'Algendar, P. Carnicero 346 & M. Galbany-Casals (BC), KP735211, KP851081, KP851004, KP851090; *C. fragilis*, 2, Spain, Balearic Islands, Menorca, Barranc d'Algendar, P. Carnicero 346 & M. Galbany-Casals (BC), --, --, KP851005, KP851091; *C. glutinosa* Bigazzi & Raffaelli subsp. *glutinosa*, 1, Italy, Spigno Saturnia, P. Carnicero 734 & M. Galbany-Casals (BC), KP735216, KP851068, KP851029, KP851114; *C. glutinosa* subsp. *glutinosa*, 2, Italy, Spigno Saturnia, P. Carnicero 734 & M. Galbany-Casals (BC), KP735217, KP851069, KP851030, KP851115; *C. glutinosa* subsp. *brevicalcarata* Bigazzi & Raffaelli, Italy, Ravello, P. Carnicero 748 & M. Galbany-Casals (BC), KP735218, KP851070, KP851020, KP851105; *C. hepaticifolia* Wettst., 1, France, Corsica, Lac du Nino, A. Hilpold s. n. (BOZ 8842), KP735223, KP851079, KP851022, KP851107; *C. hepaticifolia*, 2, France, Corsica, Castagniccia, P. Carnicero 444 & M. Galbany-Casals (BC), KP735215, KP851078, KP851013, KP851099; *C. longipes* (Boiss. & Heldr.) A. Cheval., 1, Greece, Dodecanese Islands, Karpathos, N. Böhling 8228 (B 100138948), KP735232, KP851064, KP851038, KP851123; *C. longipes*, 2, Greece, Samos, E. Gathorne-Hardy 657 (E 629368), --, --, KP851039, KP851124; *C. microcalyx* (Boiss.) Wettst. subsp. *microcalyx*, Greece, Peloponnese, Lakonia, W. Greuter & H. Merxmüller s. n. (B 100460657), KP735238, KP851063, KP851041, --; *C. microcalyx* subsp. *acutiloba* (Boiss. & Heldr.) Greuter, Turkey, Antalya, Alanya, P. H. Davis 25847 & O. Polunin (E 629362), KP735212, KP851059, KP851042, KP851126; *C. microcalyx* subsp. *dodekanesi* Greuter, Greece, Rhodes, Archangelos, P.H. Davis 40310 (E 629364), KP735208, KP851058, KP851043, KP851127; *C. microcalyx* subsp. *ebelii* (Cufod.) Cufod., Montenegro, Skadar Lake, E. Mayer 11192 & M. Mayer (B 100460658), KP735236, KP851061, KP851036, KP851121; *C. microcalyx* subsp. *minor* (Cufod.) Greuter, Greece, Kefallinia, Aenos, J. Damboldt s. n. (B 100460655), KP735237, KP851060, KP851037, KP851122; *C. muelleri* (Moris.) A. Chev., 1, Italy, Sardinia, Seui, Genni d'Acca, P. Carnicero 406 & M. Galbany-Casals (BC), KP735210, KP851080, KP851012, KP851098; *C. muelleri*, 2, Italy, Sardinia, Ulassai, P. Carnicero 389 & M. Galbany-Casals (BC), KP735209, KP866214, KP851010, KP851096; *C. muralis* G. Gaertn., B. Mey. & Scherb. subsp. *muralis*, 1, Spain, Catalonia, Sant Cugat (naturalized), P. Carnicero (no voucher), KP735230, KP851077, KP851015, KP851089; *C. muralis* subsp. *muralis*, 2,

Spain, Catalonia, Caldes de Montbui (naturalized), *P. Carnicero* 135 (BC), KP735231, KP851076, KP851017, KP851102; *C. muralis* subsp. *muralis*, 3, Poland, Slask Dolny (naturalized), *Z. Pulawska* s. n. (FI), --, --, KP851018, KP851103; *C. muralis* subsp. *muralis*, 4, Italy, Toscana, Albegna, *F. Selvi* s. n. (FI), --, --, KP851019, KP851104; *C. muralis* subsp. *visianii* (Jáv.) D. A. Webb, 1, Italy, Lazio, Palombara, *P. Carnicero* 703 & *M. Galbany-Casals* (BC), KP735226, KP851075, KP851027, KP851112; *C. muralis* subsp. *visianii*, 2, Italy, Lazio, Palombara, *P. Carnicero* 703 & *M. Galbany-Casals* (BC), --, --, KP851028, KP851113; *C. muralis* subsp. *visianii*, 3, Italy, Lazio Rocca di Papa, *P. Carnicero* 710 & *M. Galbany-Casals* (BC), KP735226, KP851074, KP851031, KP851116; *C. muralis* subsp. *visianii*, 4, Italy, Lazio Rocca di Papa, *P. Carnicero* 710 & *M. Galbany-Casals* (BC), --, --, KP851032, KP851117; *C. pallida* Wettst., 1, Italy, Abruzzo, Valle d'Orfenta, *P. Carnicero* 780 & *M. Galbany-Casals* (BC), KP735234, KP851072, KP851033, KP851118; *C. pallida*, 2, Italy, Abruzzo, Valle d'Orfenta, *P. Carnicero* 780 & *M. Galbany-Casals* (BC), KP735235, KP851071, KP851034, KP851119; *C. pallida*, 3, Italy, Abruzzo, l'Aquila, *J. Aldasoro* 3276 (MA 698766), KP735233, KP851073, KP851035, KP851120; *C. pubescens* (J. Presl & C. Presl) Cufod., 1, Italy, Sicily, Palermo, La pizzuta, *C. Aedo* 5733 & al. (MA 646152), KP735229, KP851066, KP851021, KP851106; *C. pubescens*, 2, Italy, Sicily, Trapani, Erice, *J. Güemes* 3085 & al. (SALA 106642), KP735214, KP851065, KP851024, KP851108; *C. pubescens*, 3, Italy, Sicily, Trapani, Mt. Acci, *C. Aedo* 5614 & al. (MA 646631), KP735228, KP851067, KP851025, KP851110; *C. pubescens*, 4, Italy, Sicily, Trapani, Mt. Acci, *J. Güemes* 3052 & al. (SALA 106608), KP735213, --, KP851023, KP851108; **Other Antirrhineae:** *Anarrhinum bellidifolium* (L.) Willd., Spain, Catalonia, l'Espuga de Francolí, *M. Galbany-Casals* 2303 (BC), KP735199, --, KP851052, KP851136; *Antirrhinum majus* L., Spain, Catalonia, Alella, *M. Galbany-Casals* 2302 (BC), KP735205, --, KP851048, KP851132; *Asarina procumbens* Mill., Spain, Catalonia, Montseny massif, *P. Carnicero* 253 & *L. Sáez* (BC), KP735207, KP851057, KP851045, KP851129; *Chaenorhinum crassifolium* (Cav.) Lange, Spain, Valencian Country, Serra d'Aitana, *P. Carnicero* 207 & al. (BC), KP735203, --, KP851051, KP851135; *Epixiphium wislizeni* (A. Gray) Munz, USA, New Mexico, Animas Valley, *G.R. Ballmer* s. n. (RSA 712541), KP735206, KP851056, KP851046, KP851130; *Galvezia fruticosa* J. F. Gmel., Perú, Lima, Yauyos, *M. Weigend* 7209 & al. (B 100095831), KP735197, --, KP851044, KP851128; *Kickxia spuria* (L.) Dumort. subsp. *integrifolia* (Brot.) R. Fern., Spain, Catalonia, Gallecs, *J.M. Blanco* s. n. (BC), KP735200, --, KP851053, KP851137; *Linaria cavanillesii* Chav., Spain, Valencian Country, Dènia, *P. Carnicero* 197 & al. (BC), KP735198, --, KP851050, KP851134; *Misopates orontium* (L.) Rafin., Spain, Valencian Country, Fenestrat, *P. Carnicero* 210 & al. (BC), KP735201, --, KP851049, KP851133; *Mohavea confertiflora* A. Heller, USA, California, Colorado desert, *T.R. Stoughton* 800 (RSA 778206), KP735202, --, KP851054, KP851138; *Plantago lanceolata* L., Spain, Catalonia, Cerdanyola, *P. Carnicero* 523 (BC), KP735196, --, KP851055, KP851139; *Schweinfurthia papilionacea* Boiss., Oman, Nizwa, *A. G. Miller* 6657 (E 614757), KP735204, --, KP851047, KP851131.
